# Supplementary material for: Robust protein–ligand interaction modeling through integrating physical laws and geometric knowledge for absolute binding free energy calculation
Source: Royal Society of Chemistry journal article supplement (doi:10.1039/d4sc07405j), 2025-01-01
Supplement: d4sc07405j1.pdf [file d4sc07405j1.pdf]

## Supplemental Information

**Table S1:** The performance (Pearson) of finetune\_pearson, finetune\_mse and LumiNet on the CASF-2016 and FEP datasets.

| <b>Model</b>            | CASF-2016 | FEP2  | FEP1  |
|-------------------------|-----------|-------|-------|
| <b>finetune_pearson</b> | 0.818     | 0.517 | 0.543 |
| <b>finetune_mse</b>     | 0.809     | 0.445 | 0.486 |
| <b>LumiNet</b>          | 0.848     | 0.463 | 0.646 |

**Table S2:** The performance of the LumiNet model versus baseline model on the FEP1 dataset.<sup>a</sup>

| Model                    |        | BACE | CDK2  | JNK1 | MCL  | p38   | PTP1B | Thrombin | TYK  | Averag |
|--------------------------|--------|------|-------|------|------|-------|-------|----------|------|--------|
|                          | No.    | 36   | 16    | 21   | 42   | 34    | 23    | 11       | 16   | 25     |
| LumiNet                  | R      | 0.44 | 0.53  | 0.45 | 0.81 | 0.6   | 0.79  | 0.91     | 0.6  | 0.65   |
|                          | $\rho$ | 0.42 | 0.57  | 0.50 | 0.80 | 0.6   | 0.70  | 0.89     | 0.5  | 0.64   |
|                          | RMS    | 1.7  | 1.39  | 0.75 | 0.83 | 1.0   | 1.16  | 1.05     | 1.1  | 1.13   |
| PIGNET2 <sup>1</sup>     | R      | 0.42 | 0.77  | 0.36 | 0.78 | 0.6   | 0.76  | 0.83     | 0.6  | 0.64   |
|                          | $\rho$ | 0.42 | 0.67  | 0.43 | 0.75 | 0.6   | 0.77  | 0.78     | 0.5  | 0.63   |
|                          | RMS    | 0.83 | 1.45  | 1.14 | 0.82 | 1.1   | 1.03  | 0.44     | 2.4  | 1.16   |
| PBCNET <sup>2</sup>      | R      | 0.61 | 0.66  | 0.41 | 0.72 | 0.56  | 0.75  | 0.84     | 0.64 | 0.65   |
|                          | $\rho$ | 0.52 | 0.66  | 0.47 | 0.73 | 0.56  | 0.71  | 0.82     | 0.61 | 0.64   |
|                          | RMS    | 0.91 | 1.35  | 1.21 | 1.11 | 1.15  | 1.23  | 0.42     | 1.54 | 1.11   |
| FEP+                     | R      | 0.78 | 0.48  | 0.85 | 0.77 | 0.65  | 0.8   | 0.71     | 0.89 | 0.74   |
|                          | $\rho$ | 0.74 | 0.41  | 0.9  | 0.78 | 0.64  | 0.82  | 0.62     | 0.87 | 0.72   |
|                          | RMSE   | 1.03 | 1.11  | 1    | 1.41 | 1.03  | 1.22  | 0.93     | 0.93 | 1.08   |
| Glide-SP                 | R      | 0    | -0.56 | 0.24 | 0.59 | 0.14  | 0.55  | 0.53     | 0.79 | 0.29   |
|                          | $\rho$ | 0.11 | -0.36 | 0.27 | 0.5  | -0.24 | 0.23  | 0.49     | 0.79 | 0.23   |
|                          | RMSE   | 1.4  | 2.63  | 2.16 | 1.54 | 3.24  | 2.8   | 0.92     | 2.06 | 2.09   |
| MM-GB/SA                 | R      | -0.4 | -0.53 | 0.65 | 0.42 | 0.66  | 0.67  | 0.93     | 0.79 | 0.4    |
|                          | $\rho$ | -    | -     | -    | -    | -     | -     | -        | -    | -      |
|                          | RMSE   | -    | -     | -    | -    | -     | -     | -        | -    | -      |
| DeltaDelta <sup>3</sup>  | R      | 0.13 | 0.24  | 0.55 | 0.4  | 0.37  | 0.47  | 0.05     | 0.31 | 0.32   |
|                          | $\rho$ | -    | -     | -    | -    | -     | -     | -        | -    | -      |
|                          | RMSE   | -    | -     | -    | -    | -     | -     | -        | -    | -      |
| Default2018 <sup>4</sup> | R      | 0.14 | 0.95  | 0.31 | 0.29 | 0.34  | 0.38  | 0.27     | 0.33 | 0.38   |
|                          | $\rho$ | -    | -     | -    | -    | -     | -     | -        | -    | -      |
|                          | RMSE   | -    | -     | -    | -    | -     | -     | -        | -    | -      |
| Dense <sup>4</sup>       | R      | 0.37 | 0.96  | -0.1 | 0.22 | 0.14  | 0.63  | 0.01     | 0.25 | 0.31   |
|                          | $\rho$ | -    | -     | -    | -    | -     | -     | -        | -    | -      |
|                          | RMSE   | -    | -     | -    | -    | -     | -     | -        | -    | -      |

<sup>a</sup> RMSEs are reported in kcal·mol<sup>-1</sup>.

**Table S3:** The performance of the LumiNet model versus baseline model on the FEP2 dataset.<sup>a</sup>

| Model    |        | CDK<br>8 | c-Met | Eg<br>5 | HIF-2 $\alpha$ | PFKFB3 | SHP-<br>2 | SYK   | TNKS2 | Averag<br>e |
|----------|--------|----------|-------|---------|----------------|--------|-----------|-------|-------|-------------|
|          | No.    | 33       | 24    | 28      | 42             | 40     | 26        | 44    | 27    | 33          |
| LumiNet  | R      | 0.32     | 0.75  | 0.5     | 0.39           | 0.47   | 0.39      | 0.35  | 0.52  | 0.46        |
|          | $\rho$ | 0.26     | 0.73  | 0.2     | 0.43           | 0.50   | 0.46      | 0.42  | 0.41  | 0.43        |
|          | RM     | 1.74     | 1.43  | 2.0     | 1.12           | 0.96   | 1.09      | 1.10  | 1.08  | 1.32        |
| Glide SP | R      | 0        | 0     | 0       | 0.4            | 0.47   | 0.44      | 0.24  | 0.37  | 0.24        |
|          | $\rho$ | 0.13     | 0.13  | -       | 0.42           | 0.51   | 0.44      | 0.21  | 0.32  | 0.26        |
|          | RM     | 2.49     | 3.01  | 1.9     | 1.51           | 1.57   | 1.52      | 1.27  | 1.35  | 1.83        |
| PBCNET   | R      | 0.55     | 0.7   | 0.64    | 0.19           | 0.43   | 0.4       | 0.47  | 0.36  | 0.47        |
|          | $\rho$ | 0.63     | 0.76  | 0.58    | 0.3            | 0.47   | 0.56      | 0.48  | 0.32  | 0.51        |
|          | RM     | 1.61     | 1.88  | 1.11    | 1.57           | 1.4    | 1.57      | 1.08  | 1.71  | 1.49        |
| FEP+     | R      | 0.62     | 0.9   | 0.71    | 0.61           | 0.79   | 0.71      | 0.5   | 0.4   | 0.66        |
|          | $\rho$ | 0.74     | 0.88  | 0.72    | 0.59           | 0.79   | 0.78      | 0.42  | 0.41  | 0.67        |
|          | RMSE   | 2.09     | 1.43  | 1.23    | 1.6            | 1.78   | 1.39      | 1.61  | 2.2   | 1.67        |
| MM-GB/SA | R      | 0.77     | 0.6   | 0.14    | 0.54           | 0.5    | 0.6       | 0     | 0.26  | 0.43        |
|          | $\rho$ | 0.82     | 0.64  | 0.1     | 0.48           | 0.54   | 0.5       | -0.12 | 0.22  | 0.4         |
|          | RMSE   | 7.03     | 5.96  | 10.09   | 11.69          | 6.99   | 8.76      | 15.81 | 7.9   | 9.28        |

<sup>a</sup> RMSEs are reported in kcal·mol<sup>-1</sup>.

**Table S4:** The performance of LumiNet on the PDE10A dataset based on four

partitioning methods of time splits and random splits.<sup>a</sup>

| Method                         | Random split |      | Temporal split 201<br>1 |      | Temporal split 201<br>2 |      | Temporal split 201<br>3 |      |
|--------------------------------|--------------|------|-------------------------|------|-------------------------|------|-------------------------|------|
|                                | $\rho$       | RMSE | $\rho$                  | RMSE | $\rho$                  | RMSE | $\rho$                  | RMSE |
| Mean of train. and val         | –            | 1.19 | –                       | 1.03 | –                       | 1.18 | –                       | 1.22 |
| Vanilla GOLD.PLP <sup>6</sup>  | 0.31         | –    | 0.20                    | –    | 0.29                    | –    | 0.54                    | –    |
| Template GOLD.PLP <sup>6</sup> | 0.45         | –    | 0.31                    | –    | 0.56                    | –    | 0.66                    | –    |
| RF-PLP <sup>7</sup>            | 0.56         | 1.10 | 0.40                    | 1.05 | 0.62                    | 0.97 | 0.61                    | 0.99 |
| AttentiveFP <sup>8</sup>       | 0.70         | 0.86 | 0.40                    | 1.07 | 0.32                    | 1.74 | 0.44                    | 1.16 |
| 2D3D hybrid                    | 0.72         | 0.85 | 0.57                    | 0.81 | 0.56                    | 1.25 | 0.61                    | 0.95 |
| ACNN <sup>9</sup>              | 0.65         | 1.00 | 0.37                    | 1.45 | 0.08                    | 1.60 | 0.54                    | 1.02 |
| PotentialNet <sup>10</sup>     | 0.55         | 1.68 | 0.34                    | 2.53 | 0.45                    | 2.22 | 0.67                    | 1.90 |
| AttentiveFP extended           | –            | –    | 0.41                    | 1.12 | 0.51                    | 1.08 | 0.60                    | 1.07 |
| 2D3D hybrid extended           | –            | –    | 0.57                    | 0.82 | 0.68                    | 0.90 | 0.66                    | 0.90 |
| LumiNet                        | 0.80         | 0.76 | 0.55                    | 0.91 | 0.74                    | 0.82 | 0.68                    | 1.14 |

<sup>a</sup> RMSEs are reported in kcal·mol<sup>-1</sup>.

**Table S5:** The performance of LumiNet on the PDE10A dataset based on three partitioning methods of structural binding models.<sup>a</sup>

| Method                 | aminohetaryl_c1_a |      | c1_hetaryl_alkyl_c2_ |      | aryl_c1_amide_c2_ |      |
|------------------------|-------------------|------|----------------------|------|-------------------|------|
|                        | $\rho$            | RMSE | $\rho$               | RMSE | $\rho$            | RMSE |
| Mean of train. and val | –                 | 1.18 | –                    | 1.14 | –                 | 1.24 |
| Vanilla GOLD.PLP       | 0.20              | –    | 0.38                 | –    | 0.25              | –    |
| Template GOLD.PLP      | 0.33              | –    | 0.49                 | –    | <b>0.59</b>       | –    |
| RF-PLP                 | 0.40              | 1.48 | 0.42                 | 1.09 | 0.52              | 1.18 |
| AttentiveFP            | 0.40              | 1.28 | 0.11                 | 2.04 | 0.24              | 1.25 |
| 2D3D hybrid            | 0.47              | 1.04 | 0.31                 | 1.36 | 0.50              | 1.05 |
| LumiNet                | 0.56              | -    | 0.64                 | -    | 0.49              | -    |

<sup>a</sup> RMSEs are reported in kcal·mol<sup>-1</sup>.

**Table S6:** Semi-supervised learning for the best effect of the first strategy optimization on the FEP1 dataset.<sup>a</sup>

| No. iter    |        | BAC E | CDK 2 | JNK1 | MCL1 | p38  | PTP1 B | Thrombin | TYK2 | Average |
|-------------|--------|-------|-------|------|------|------|--------|----------|------|---------|
|             |        | No.   | 36    | 16   | 21   | 42   | 34     | 23       | 11   | 16      |
| LumiNet     | R      | 0.44  | 0.53  | 0.45 | 0.81 | 0.6  | 0.79   | 0.91     | 0.60 | 0.65    |
|             | $\rho$ | 0.42  | 0.57  | 0.50 | 0.80 | 0.6  | 0.70   | 0.89     | 0.59 | 0.64    |
|             | RMSE   | 1.7   | 1.39  | 0.75 | 0.83 | 1.0  | 1.16   | 1.05     | 1.16 | 1.13    |
| iteration 1 | R      | 0.48  | 0.66  | 0.61 | 0.62 | 0.65 | 0.75   | 0.86     | 0.72 | 0.67    |
|             | $\rho$ | 0.50  | 0.72  | 0.64 | 0.63 | 0.68 | 0.75   | 0.85     | 0.73 | 0.69    |
|             | RMSE   | -     | -     | -    | -    | -    | -      | -        | -    | -       |
| iteration 2 | R      | 0.47  | 0.67  | 0.68 | 0.75 | 0.65 | 0.73   | 0.92     | 0.69 | 0.70    |
|             | $\rho$ | 0.48  | 0.73  | 0.73 | 0.76 | 0.67 | 0.71   | 0.87     | 0.68 | 0.70    |
|             | RMSE   | -     | -     | -    | -    | -    | -      | -        | -    | -       |

<sup>a</sup> MAEs and RMSEs are reported in kcal·mol<sup>-1</sup>.

**Table S7:** Semi-supervised learning for the best effect of the first strategy optimization on the FEP2 dataset.<sup>a</sup>

| No. iter    |        | CDK8 | c-Met | Eg5  | HIF-2 $\alpha$ | PFKF B3 | SHP-2 | SYK  | TNKS 2 | Average |
|-------------|--------|------|-------|------|----------------|---------|-------|------|--------|---------|
|             | No.    | 33   | 24    | 28   | 42             | 40      | 26    | 44   | 27     | 33      |
| LumiNet     | R      | 0.32 | 0.7   | 0.50 | 0.39           | 0.47    | 0.39  | 0.35 | 0.52   | 0.46    |
|             | $\rho$ | 0.26 | 0.7   | 0.22 | 0.43           | 0.50    | 0.46  | 0.42 | 0.41   | 0.43    |
|             | RMS    | 1.74 | 1.4   | 2.05 | 1.12           | 0.96    | 1.09  | 1.1  | 1.08   | 1.32    |
| iteration 1 | R      | 0.34 | 0.89  | 0.60 | 0.40           | 0.38    | 0.50  | 0.40 | 0.51   | 0.50    |
|             | $\rho$ | 0.27 | 0.85  | 0.38 | 0.48           | 0.44    | 0.55  | 0.41 | 0.47   | 0.48    |
|             | RMSE   | -    | -     | -    | -              | -       | -     | -    | -      | 1.23    |
| iteration 2 | R      | 0.44 | 0.81  | 0.70 | 0.41           | 0.36    | 0.57  | 0.45 | 0.49   | 0.53    |
|             | $\rho$ | 0.44 | 0.77  | 0.51 | 0.50           | 0.45    | 0.59  | 0.43 | 0.40   | 0.51    |
|             | RMSE   | -    | -     | -    | -              | -       | -     | -    | -      | 1.21    |

<sup>a</sup> RMSEs are reported in kcal·mol<sup>-1</sup>.

**Table S8:** Semi-supervised learning for the average effect of the second strategy optimization on the FEP1 dataset.<sup>a</sup>

| Repeat  | No. 2 |        |      | No. 6 |        |      |
|---------|-------|--------|------|-------|--------|------|
|         | R     | $\rho$ | RMSE | R     | $\rho$ | RMSE |
| 1       | 0.67  | 0.64   | 0.89 | 0.75  | 0.75   | 0.81 |
| 2       | 0.69  | 0.71   | 0.95 | 0.71  | 0.72   | 0.81 |
| 3       | 0.67  | 0.66   | 1.05 | 0.74  | 0.75   | 0.81 |
| 4       | 0.66  | 0.65   | 1.00 | 0.72  | 0.73   | 0.87 |
| 5       | 0.70  | 0.69   | 0.93 | 0.74  | 0.71   | 0.81 |
| Average | 0.68  | 0.67   | 0.96 | 0.73  | 0.73   | 0.82 |

<sup>a</sup> RMSEs are reported in kcal·mol<sup>-1</sup>.

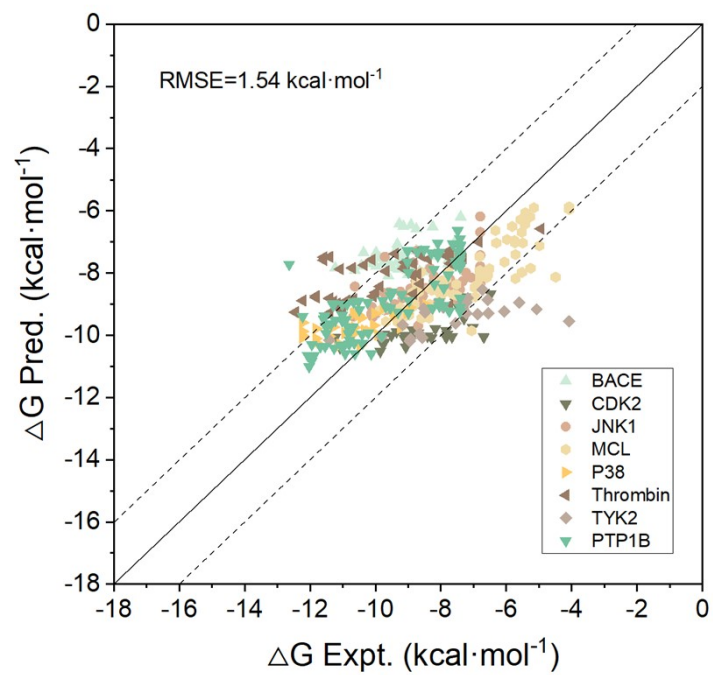

**Figure S1:** The performance of LumiNet on the extended FEP1 dataset<sup>5</sup>, which includes 8 targets and 407 ligands.

## References

1. S. Moon, S.-Y. Hwang, J. Lim and W. Y. Kim, PIGNet2: a versatile deep learning-based protein–ligand interaction prediction model for binding affinity scoring and virtual screening, *Digital Discovery*, 2024, **3**, 287-299.
2. J. Yu, Z. Li, G. Chen, X. Kong, J. Hu, D. Wang, D. Cao, Y. Li, R. Huo, G. Wang, X. Liu, H. Jiang, X. Li, X. Luo and M. Zheng, Computing the relative binding affinity of ligands based on a pairwise binding comparison network, *Nature Computational Science*, 2023, **3**, 860-872.
3. J. Jiménez-Luna, L. Pérez-Benito, G. Martínez-Rosell, S. Sciabola, R. Torella, G. Tresadern and G. De Fabritiis, DeltaDelta neural networks for lead optimization of small molecule potency, *Chemical Science*, 2019, **10**, 10911-10918.
4. A. T. McNutt and D. R. Koes, Improving  $\Delta\Delta G$  Predictions with a Multitask Convolutional Siamese Network, *Journal of Chemical Information and Modeling*, 2022, **62**, 1819-1829.
5. H. Goel, A. Hazel, V. D. Ustach, S. Jo, W. Yu and A. D. MacKerell, Rapid and accurate estimation of protein–ligand relative binding affinities using site-identification by ligand competitive saturation, *Chemical Science*, 2021, **12**, 8844-8858.
6. A. Tosstorff, J. C. Cole, R. Taylor, S. F. Harris and B. Kuhn, Identification of Noncompetitive Protein–Ligand Interactions for Structural Optimization, *Journal of Chemical Information and Modeling*, 2020, **60**, 6595-6611.
7. A. Tosstorff, J. C. Cole, R. Bartelt and B. Kuhn, Augmenting Structure-Based Design with Experimental Protein-Ligand Interaction Data: Molecular Recognition, Interactive Visualization, and Rescoring, *ChemMedChem*, 2021, **16**, 3428-3438.
8. Z. Xiong, D. Wang, X. Liu, F. Zhong, X. Wan, X. Li, Z. Li, X. Luo, K. Chen, H. Jiang and M. Zheng, Pushing the Boundaries of Molecular Representation for Drug Discovery with the Graph Attention Mechanism, *Journal of Medicinal*



*Chemistry*, 2020, **63**, 8749-8760.

9. J. Gomes, B. Ramsundar, E. N. Feinberg and V. S. Pande, Atomic convolutional networks for predicting protein-ligand binding affinity, *arXiv preprint arXiv:1703.10603*, 2017.
10. E. N. Feinberg, D. Sur, Z. Wu, B. E. Husic, H. Mai, Y. Li, S. Sun, J. Yang, B. Ramsundar and V. S. Pande, PotentialNet for Molecular Property Prediction, *ACS Central Science*, 2018, **4**, 1520-1530.
